# Supplementary material for: A multisite dynamic synergistic oxygen evolution reaction mechanism of Fe-doped NiOOH: a first-principles study
Source: Royal Society of Chemistry journal article supplement (doi:10.1039/d3cp04661c), 2023-01-01
Supplement: d3cp04661c2.pdf [file d3cp04661c2.pdf]

### Supporting Information:



**Fig. S1.** Dopant site search of Fe dopant on  $\gamma$ -NiOOH surface. Here we considered two different possible dopant sites on NiOOH (see above) and found that Fe prefers to substitute the Ni<sup>δ</sup> (site 1). Red, gray, white, and brown balls represent O, Ni, H, and Fe, respectively.



**Fig. S2.** Free energy diagram corrected for implicit solvation of NiOOH and NiFeOOH models toward OER. Pathway C (the designed MDSM mechanism) for NiOOH (a) and NiFeOOH (b).



**Fig. S3.** Schematic diagram of the  $\text{Ni}^\gamma$  site deprotonation process. The dark cycles represents the  $\text{Ni}^\gamma$  that will participate in the reaction.



**Fig. S4.** PDOS of  $\text{O}^{\text{br}}$   $2p$  and  $\text{M}$   $3d$  orbit in state A-1 for  $\text{NiOOH}$  (a) and  $\text{NiFeOOH}$  (b) models. The black dash line represents the Fermi level.



**Fig. S5.** Schematic diagram of magnetic moments ( $\mu_B$ ) of O species.
